# Supplementary material
Source: PubMed Central journal article supplement (PMC3057356)
Supplement: NIHMS251219-supplement-1.pdf [file NIHMS251219-supplement-1.pdf]

**Supplementary Table 1: Listing of additional bacterial methylases that generate SAH.**

| <b>Pathway</b>                                               | <b>Enzyme involved</b>                                                          | <b>Reference</b>                                                                                                  |
|--------------------------------------------------------------|---------------------------------------------------------------------------------|-------------------------------------------------------------------------------------------------------------------|
| Cobinamide synthesis                                         | Methyl and O-methyl transferases (EC 2.1.1.130 and EC 2.1.1.131)                | (Roessner <i>et al.</i> , 1992)                                                                                   |
| Vitamin B12 synthesis                                        | Cobalt-precorrin-2C(20)-methyltransferase (EC 2.1.1.151)                        | (Scott <i>et al.</i> , 1993)                                                                                      |
| Tetrapyrrole biosynthesis or Precorrin-2/heme d(1) synthesis | Uroporphyrinogen- or NirE Uroporphyrinogen III-methyltransferase (EC 2.1.1.107) | (Warren <i>et al.</i> , 1994, Lobo <i>et al.</i> , 2009, Storbeck <i>et al.</i> , 2009)                           |
| Chitooligosaccharide methylation                             | NodS N-methyltransferase                                                        | (Geelen <i>et al.</i> , 1993, Cakici <i>et al.</i> , 2008, Geelen <i>et al.</i> , 1995)                           |
| Albicidin biosynthesis                                       | XabC O-methyltransferase                                                        | (Huang <i>et al.</i> , 2000)                                                                                      |
| Iodine methylations                                          | Methyl halide transferase (EC 2.1.1.65)                                         | (Amachi <i>et al.</i> , 2001)                                                                                     |
| Cyclopropanation                                             | Methylene-fatty acyl-phospholipid synthase (EC 2.1.1.16)                        | (Glickman <i>et al.</i> , 2001, Rao <i>et al.</i> , 2005)                                                         |
| Cyclopropanation (Methylation of unsaturated FA)             | Cyclopropane-fatty acyl-phospholipid synthase (EC 2.1.1.79)                     | (Budin-Verneuil <i>et al.</i> , 2005)                                                                             |
| Biosynthesis of oxygenated-, keto- and methoxy mycolic acids | Methyltransferases                                                              | (Boissier <i>et al.</i> , 2006, Alahari <i>et al.</i> , 2009)                                                     |
| Bacteriochlorophyll c biosynthesis                           | BchU C-20 Methyltransferase                                                     | (Wada <i>et al.</i> , 2006, Gomez Maqueo Chew <i>et al.</i> , 2007)                                               |
| Phenolic substrate methylation for antibiotic production     | O-methyltransferase                                                             | (Hou <i>et al.</i> , 2007)                                                                                        |
| Biosynthesis of macrolide antibiotics                        | Macrocin O-methyltransferase (EC 2.1.1.101)                                     | (Li <i>et al.</i> , 2009)                                                                                         |
| Phospholipid methylation                                     | PmtA phospholipid N-methyltransferase (EC 2.1.1.17)                             | (Aktas & Narberhaus, 2009)                                                                                        |
| Biosynthesis of polyketides                                  | Methyltransferases                                                              | (Zimmermann <i>et al.</i> , 2009, Li & Muller, 2009, Zhang & Tang, 2009, Zhan, 2009, Nakano <i>et al.</i> , 2009) |
